# 1 *C. elegans* dauer recovery varies with 2 worm-bacteria interactions

3 Louis T. Bubrig<sup>1\*</sup>, John M. Sutton<sup>1</sup>, Janna L. Fierst<sup>1</sup>

\*For correspondence:

[ltbubrig@crimson.ua.edu](mailto:ltbubrig@crimson.ua.edu) (LTB)

4 <sup>1</sup>Department of Biological Sciences, The University of Alabama

---

## 6 Abstract

7 Many species use dormant stages for habitat selection by tying recovery from the stage  
8 to informative external cues. Other species have an undiscerning strategy in which they  
9 recover randomly despite having advanced sensory systems. We investigated the  
10 nematode *Caenorhabditis elegans* dormant (dauer) stage to determine whether  
11 elements of its habitat structure and life history have barred the species from evolving  
12 a discerning recovery strategy. *C. elegans* colonization success is profoundly influenced  
13 by the bacteria found in its habitat patches. We exposed dauers of three genotypes to a  
14 range of bacteria acquired from the worms' natural habitat. We found that *C. elegans*  
15 dauers recover in all conditions but increase recovery on certain bacteria depending on  
16 the worm's genotype, suggesting a combination of undiscerning and discerning  
17 strategies. Additionally, the worms' responses did not match the bacteria's objective  
18 quality, suggesting that their decision is based on other characteristics.

---

## 20 Introduction

21 Many organisms use developmentally-arrested dormant stages to endure harsh environ-  
22 ments and/or disperse to better ones (*Baskin and Baskin, 1998*). Dormant stages must  
23 recover to resume growth but this transition is often irreversible and exposes the individ-  
24 ual to new dangers (*Raimondi, 1988*). Therefore, individuals that assess local conditions  
25 and tie this information to their recovery can increase their fitness (*Keough and Downes,*  
26 *1982*). Unsurprisingly, this has led to the evolution of a diversity of discerning strategies  
27 (*Baskin and Baskin, 1998; Johnson et al., 1997*). The cues that induce dormant stage re-  
28 covery are tailored to the organism's abiotic and biotic needs; the strategies can be as  
29 simple as measuring temperature (*Finch-Savage and Leubner-Metzger, 2006*) or detect-  
30 ing conspecifics (*Burke, 1986*) and as complicated as parsing out signals from whole com-  
31 munities. Coral larvae, for example, can differentiate between algal species growing in a  
32 prospective settlement site (*Harrington et al., 2004*). While many species develop these  
33 discerning strategies, other species seem to adopt an undiscerning strategy, recovering  
34 under all conditions, even poor ones (*Keough and Downes, 1982*). If these species have  
35 variable habitat qualities that impact their fitness, why aren't discerning strategies being  
36 selected for?

37 One possible explanation is that discerning strategies only arise if they help organisms  
38 avoid bad habitats and find good ones. A dormant organism may ignore salient informa-

tion about its environment if it has no capacity to act on it (**Raimondi, 1988**). Behavioral constraints, life history traits, and habitat structure may prevent the development of discerning strategies, even when they would seem useful at first glance. In this project, we investigated how the nematode *Caenorhabditis elegans* recovers from its dormant stage—the dauer (Fig. 1)—given that the species seems pulled in two opposite directions. On one hand, the dauer appears perfectly suited for a complex habitat recognition system. This dormant stage is carried by small invertebrates to new habitat patches that vary substantially in their quality with some patches being totally inhospitable due to their bacterial community composition (**Samuel et al., 2016; Kiontke and Sudhaus, 2006**). Bacteria can be good sources of food or deadly pathogens depending on the species (**Felix and Braendle, 2010; Samuel et al., 2016**) and *C. elegans* can certainly differentiate between them (**Johnson et al., 1997**), at least from a mechanistic standpoint. Recovering is an irreversible decision that affects fitness: dauers are hardy and long-lived but cannot reproduce (**Cassada and Russell, 1975; Klass and Hirsh, 1976; Ellenby, 1968**) while recovered worms can establish colonies but are vulnerable.

On the other hand, behavioral constraints and habitat structure may keep *C. elegans* from developing discerning recovery strategies. *C. elegans* dauers cannot control their invertebrate carriers and will be dropped off in bad habitats and good habitats alike. Unlike seeds which can stay put and ride out bad conditions for years (**Baskin and Baskin, 1998**), *C. elegans*'s natural habitats are ephemeral, rotting away in a matter of days (**Ferrari et al., 2017**). Unlike many marine invertebrates which can reject bad sites and move on to others (**Pawlik, 1992**), we have no evidence that *C. elegans* can do the same; the worms are likely stuck wherever they first arrive. External cues are only useful if they are actionable (**Raimondi, 1988**), so the worms' lack of choice may lead them to ignore these cues in favor of simply recovering indiscriminately in the hopes of establishing a foothold.

We investigated how these opposing aspects of *C. elegans*' ecology translate into recovery strategies by exposing dauers to a range of bacteria. We used four ecologically-relevant bacterial species isolated from *C. elegans*' natural habitat (**Samuel et al., 2016**). We also sequenced the genomes of these four bacteria to facilitate future studies into natural worm-bacteria interactions. **Samuel et al., 2016** categorized each bacterial species based on *C. elegans* population growth and immune system activation. *Raoultella* sp. RIT712 and *Providencia* sp. JUb39 are considered "beneficial" because they support *C. elegans* population growth and do not activate the worm's immune system. *Serratia* sp. MYb239 and *Pseudomonas* sp. SNU WT1 are "detritmental" because they are pathogenic and cannot support *C. elegans* populations. In ad-

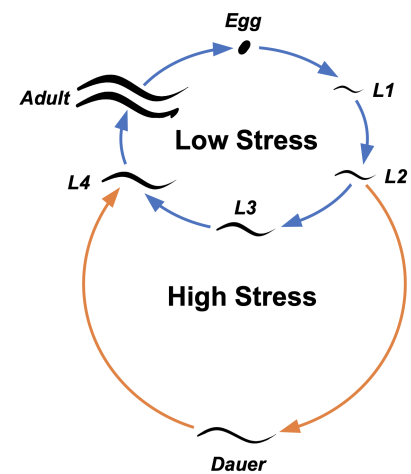

**Figure 1.** The life cycle of *C. elegans*. Newly hatched worms that sense high environmental stress become dauer larvae instead of the normal third larval stage (L3). Dauers that sense improving conditions can reenter the low stress cycle and continue to adulthood.

85 dition to the natural bacteria, we included *Escherichia coli* OP50, the standard laboratory  
86 food which is not a natural food source (*Frezal and Felix, 2015*), and a control treatment  
87 with no food at all. To determine if *C. elegans* exhibits intraspecific variation in dormancy  
88 recovery, we tested three different worm strains that are geographically and genetically  
89 distinct. N2, isolated in Bristol, is the *C. elegans* reference strain which has been used  
90 since the mid 1900s. CB4856 is a very distant relative isolated in Hawaii. JU1395 is a  
91 much more recent isolate taken from France in 2008. We exposed dauers to bacteria  
92 for three hours, after which we collected and scored them based on their recovery sta-  
93 tus. Our data suggest that *C. elegans* dauer recovery has elements of both undiscerning  
94 and discerning strategies: *C. elegans* dauers recover regardless of condition but enhance  
95 their recovery when detecting certain bacteria. Additionally, *C. elegans* exhibits intraspe-  
96 cific variation in its recovery behavior.

## 97 Results

98 Observations are summarized in Table 1. Of the 19,071 worms observed in this project,  
99 8384 (or about 44%) recovered from the dauer stage after a three hour exposure. Re-  
100 covery was not evenly distributed among the worm strains. N2 worms recovered the  
101 least—about 34.4%—which is consistent with previous work on recovery in this strain (*Cas-  
102 sada and Russell, 1975*). CB4856 had a slightly higher recovery at 39.2% while JU1395  
103 had a much higher recovery at 56.4% (Fig. 2). Additionally, there were some batch ef-  
104 fects among the trials; the worms in certain trials had depressed or enhanced recovery  
105 across the board (Fig. S1).

**Table 1.** Summary of observations categorized by worm strain, bacterial treatment, and recovery status

|        |             | Control | <i>E. coli</i> | <i>Raoultella</i> | <i>Providencia</i> | <i>Pseudomonas</i> | <i>Serratia</i> |
|--------|-------------|---------|----------------|-------------------|--------------------|--------------------|-----------------|
| N2     | Total Worms | 654     | 808            | 980               | 921                | 987                | 1372            |
|        | % Recovered | 29.2%   | 38.0%          | 36.0%             | 36.3%              | 33.4%              | 32.9%           |
| CB4856 | Total Worms | 1011    | 954            | 1258              | 895                | 896                | 1438            |
|        | % Recovered | 32.6%   | 42.6%          | 40.2%             | 36.2%              | 37.6%              | 43.4%           |
| JU1395 | Total Worms | 1048    | 1031           | 1374              | 1125               | 1112               | 1207            |
|        | % Recovered | 50.6%   | 52.5%          | 56.8%             | 66.7%              | 53.3%              | 57.7%           |

106 Worm recovery depended on bacterial treatment but also on which strain was detect-  
107 ing the bacteria, suggesting an interaction between these two variables (Fig. 3). N2 had  
108 broadly enhanced recovery on all beneficial bacteria with the highest mean recovery on  
109 *E. coli*. N2 also enhanced its recovery on the detrimental bacteria but only marginally.  
110 CB4856's recovery was similar to N2's but included an enhanced recovery on the detri-  
111 mental bacterium *Serratia* sp. MYb239. JU1395 recovered the most on the beneficial  
112 bacterium *Providencia* sp. JUb39. JU1395's recovery on *Serratia* sp. MYb239 was also very  
113 high, although this seems driven by one outlier during trial 2 in which JU1395's recovery  
114 increased by a factor of 4.60.

115 When categorizing the bacterial species, *Samuel et al., 2016* only performed worm  
116 growth assays using the N2 strain. We expanded this assay to include CB4856 and JU1395.  
117 We found that CB4856 and JU1395 grow no differently than N2 on the range of bacteria,  
118 so the categorizations established in *Samuel et al., 2016* hold. Worms on beneficial bacte-

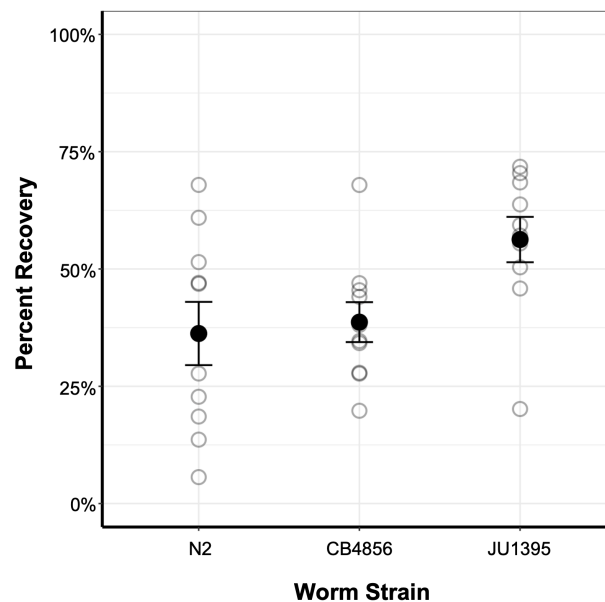

**Figure 2.** Mean recovery for the three worm strains. Faded points are average recovery values for each trial with all treatments combined. Error bars show standard error of the mean.

119 ria reached adulthood and produced eggs somewhere between 50 and 70.5 hours after  
120 they began feeding. *Serratia* sp. MYb239 attracted and killed worms such that the pop-  
121 ulation could not progress past the first few larval stages. *Pseudomonas* sp. SNU WT1  
122 repelled worms, keeping them in the first larval stage (L1) or the dauer stage. A few in-  
123 dividuals managed to reach adulthood on the *Pseudomonas* sp. SNU WT1 plates, but  
124 this was likely due to scavenging contaminants outside the lawn; the same phenomenon  
125 occurred on control plates that had no food.

## 126 Statistical Analysis

127 Because recovering from dauer is a binary developmental choice, we built a logistic re-  
128 gression model to explore which variables affected a worm's probability of recovering.  
129 The basic results of the model are shown in Table 2. The model uses the worm strain N2  
130 and the control treatment as baselines. Odds ratios represent the fold-change in prob-  
131 ability of recovering compared to the baseline. For example, any worm recovering on *E.*  
132 *coli* as opposed to the control has a 1.70-fold increased probability of recovering. Odds  
133 ratios for the remaining variables can be found in Table S1.

134 Our model shows a significant interaction between "Worm Strain" and "Treatment".  
135 This means that the odds ratios listed under "Treatment" in Table 2 should vary with  
136 worm strain. Table 3 shows the amounts by which they are adjusted, as well as the re-  
137 sulting odds ratios. Because N2 is the baseline worm strain and the control is the baseline  
138 treatment, N2 needs no adjustments, nor do any of the controls. The adjustments are  
139 made to the original odds ratios by simple multiplication. For example, a worm's prob-  
140 ability of recovery is predicted to increase 1.70-fold when exposed to *E. coli*. CB4856,  
141 however, is 0.92 times less likely to recover on *E. coli* than N2, the baseline worm strain.  
142 Therefore, CB4856's recovery on *E. coli* is actually only 1.56-fold higher than its recovery  
143 on the control.

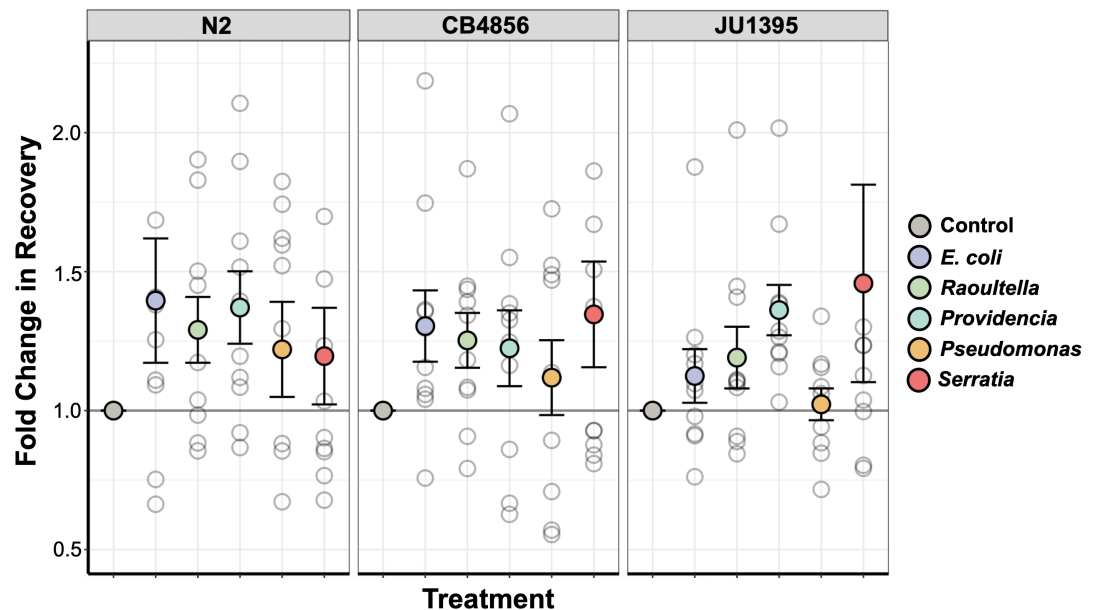

**Figure 3.** Fold change in recovery standardized by the percent recovered on the control of each trial. Cool colors represent beneficial bacteria and warm colors represent detrimental bacteria. Error bars show standard error of the mean. Five outlier points lie off the graph: N2 on *E. coli* OP50 has a value at 3.21; N2 on *Pseudomonas* sp. SNU WT1 has a value at 0.20; N2 on *Serratia* sp. MYb239 has a value at 2.46; CB4856 on *Serratia* sp. MYb239 has a value at 2.67; JU1395 on *Serratia* sp. MYb239 has a value at 4.60.

**Table 2.** Estimated odds ratios for each value of the variables "Worm Strain" and "Treatment".

| Variable    | Value              | Odds Ratio | 95 % CI      |
|-------------|--------------------|------------|--------------|
| Worm Strain |                    |            |              |
|             | N2                 | 1.00       |              |
|             | CB4856             | 1.28       | (1.02, 1.59) |
|             | JU1395             | 2.60       | (2.10, 3.22) |
| Treatment   |                    |            |              |
|             | Control            | 1.00       |              |
|             | <i>E. coli</i>     | 1.70       | (1.34, 2.15) |
|             | <i>Raoultella</i>  | 1.79       | (1.38, 2.32) |
|             | <i>Providencia</i> | 1.50       | (1.20, 1.88) |
|             | <i>Pseudomonas</i> | 1.54       | (1.20, 1.97) |
|             | <i>Serratia</i>    | 1.50       | (1.17, 1.93) |

**Table 3.** Odds ratios of treatments adjusted due to interactions between "Worm Strain" and "Treatment".

| Worm Strain | Treatment          | Odds Ratio (without interaction) | Odds Ratio Adjustment | Odds Ratio (with interaction) |
|-------------|--------------------|----------------------------------|-----------------------|-------------------------------|
| N2          |                    |                                  |                       |                               |
|             | Control            | 1.00                             |                       | 1.00                          |
|             | <i>E. coli</i>     | 1.70                             |                       | 1.70                          |
|             | <i>Raoultella</i>  | 1.79                             |                       | 1.79                          |
|             | <i>Providencia</i> | 1.50                             |                       | 1.50                          |
|             | <i>Pseudomonas</i> | 1.54                             |                       | 1.54                          |
|             | <i>Serratia</i>    | 1.50                             |                       | 1.50                          |
| CB4856      |                    |                                  |                       |                               |
|             | Control            | 1.00                             |                       | 1.00                          |
|             | <i>E. coli</i>     | 1.70                             | 0.92                  | 1.56                          |
|             | <i>Raoultella</i>  | 1.79                             | 0.86                  | 1.53                          |
|             | <i>Providencia</i> | 1.50                             | 0.79                  | 1.18                          |
|             | <i>Pseudomonas</i> | 1.54                             | 0.90                  | 1.38                          |
|             | <i>Serratia</i>    | 1.50                             | 1.06                  | 1.58                          |
| JU1395      |                    |                                  |                       |                               |
|             | Control            | 1.00                             |                       | 1.00                          |
|             | <i>E. coli</i>     | 1.70                             | 0.75                  | 1.28                          |
|             | <i>Raoultella</i>  | 1.79                             | 0.85                  | 1.52                          |
|             | <i>Providencia</i> | 1.50                             | 1.32                  | 1.98                          |
|             | <i>Pseudomonas</i> | 1.54                             | 0.74                  | 1.14                          |
|             | <i>Serratia</i>    | 1.50                             | 1.09                  | 1.64                          |

## 144 Bacteria Sequencing

145 The results of our sequencing are shown in Table 4. Each bacterial species except for *E.*  
 146 *coli* OP50 was given a temporary name in **Samuel et al., 2016**. We found that three of the  
 147 four wild bacteria genomes matched previously reported genomes, so the names given  
 148 to those genomes were adopted for this project. The genome of *Providencia* sp. JUb39  
 149 did not match any reported genome so we retained the name given in **Samuel et al.,**  
 150 **2016**. Additionally, we found that *Serratia* sp. MYb239—which was found associated with  
 151 *C. elegans* in France (**Samuel et al., 2016**)—has been found independently in *C. elegans*  
 152 habitats in Germany (Accession number: CP023268).

**Table 4.** Summary of information about sequenced bacteria.

| Species                        | Category    | Name in Samuel et al. 2016      | Genome size | Number of contigs |
|--------------------------------|-------------|---------------------------------|-------------|-------------------|
| <i>Escherichia coli</i> OP50   | Beneficial  | <i>Escherichia coli</i> OP50    | 4,616,404   | 1                 |
| <i>Raoultella</i> sp. RIT712   | Beneficial  | <i>Enterobacter</i> sp. JUb54   | 5,422,632   | 1                 |
| <i>Providencia</i> sp. JUb39   | Beneficial  | <i>Providencia</i> sp. JUb39    | 4,340,164   | 2                 |
| <i>Pseudomonas</i> sp. SNU WT1 | Detrimental | <i>Pseudomonas</i> sp. BIGb0427 | 5,864,124   | 7                 |
| <i>Serratia</i> sp. MYb239     | Detrimental | <i>Serratia</i> sp. JUb9        | 5,108,081   | 1                 |

## 153 Dauer genes

154 *C. elegans* dauer entry and recovery are influenced by several well-characterized path-  
 155 ways including those underlying pheromone synthesis, guanylyl cyclase, TGF $\beta$ -like, insulin-

156 like and steroid hormone synthesis (*Girard et al., 2007*). Since the three worm strains  
157 responded differently to the range of bacteria, we sought to characterize molecular poly-  
158 morphisms in these conserved dauer-controlling pathways. N2 and CB4856 already had  
159 sequenced and assembled genomes (*Kim et al., 2019*), so we sequenced JU1395's genome  
160 to allow for comparisons between the three strains. The assembled sequence was  
161 103,053,620 nucleotides in 161 contiguous pieces. We used the software BUSCO to esti-  
162 mate the completeness of the assembled sequence by searching for a set of 3,131 genes  
163 thought to be conserved across nematodes (*Seppely et al., 2019*). We identified 98% of  
164 these genes in our assembled sequence with 97.4% found in complete single copy, 0.6%  
165 duplicated, 0.5% fragmented and 1.5% missing. For reference, the N2 *C. elegans* assem-  
166 bled genome sequence has 98.5% of this 3,131 gene set with 98% in single copy, 0.5%  
167 duplicated, 0.3% fragmented and 1.2% missing.

168 We aligned 113 *C. elegans* transcripts from 67 dauer-associated genes to the assem-  
169 bled CB4856 and JU1395 sequences. Neither genome has been fully annotated for protein-  
170 coding genes and we used these alignments to measure polymorphisms and potential  
171 divergence in genes underlying these pathways. We identified relatively few polymor-  
172 phisms in these sequences in JU1395 and CB4856. For example, there were only 18  
173 polymorphisms in 9 genes between N2 and JU1395 and 46 polymorphisms in 15 genes  
174 between N2 and CB4856. The full list of dauer-associated pathways, genes and polymor-  
175 phisms is given in the Supplementary Materials. These polymorphisms are interesting  
176 targets for future studies investigating the genetic basis of the worm-microbe interac-  
177 tions.

## 178 Discussion

179 When habitat quality affects an organism's fitness, we expect natural selection to align  
180 an organism's recovery with habitat quality. In the case of *C. elegans*, variation in habitat  
181 quality might select for worms that can differentiate between bacteria, a key determinant  
182 of establishment success. However, *C. elegans* disperses via a carrier and cannot choose  
183 its habitat; modulating dauer recovery might not provide worms with any advantage  
184 (*Raimondi, 1988*). In this case, the fittest strategy could be one of high rapid recovery  
185 across the board to outcompete other colonists. Our data is consistent with both of  
186 these hypotheses.

187 All three worm strains recovered substantially in all treatments—even in the absence  
188 of food—which suggests that some level of recovery is guaranteed, regardless of habitat  
189 quality. This supports the hypothesis in which *C. elegans* cannot choose its habitat and  
190 recovers no matter what. Presumably, worms that try to colonize a bad habitat have  
191 higher fitness than worms that refuse to try at all (*Johnson et al., 1997*). The basal level  
192 of recovery depended on the worm strain. N2 has the lowest basal recovery of the three  
193 strains. Interestingly, N2 is also reluctant to enter the dauer stage in the first place (*Lee*  
194 *et al., 2019*). CB4856 has a similar recovery as N2 despite their large genetic divergence.  
195 JU1395 has the highest recovery by far. These differences may result from variation in  
196 conserved dauer-controlling pathways. We found that the three strains have several poly-  
197 morphisms in key dauer genes. For example, JU1395 has a polymorphism in *daf-22*, a  
198 gene involved in dauer pheromone synthesis (*Golden and Riddle, 1985*), while N2 and  
199 CB4856 have identical *daf-22* sequences. Determining these polymorphisms' functional  
200 impact—if any—can be addressed in future work using the genetic tools available in *C. el-*

201 *egans*. From an evolutionary point of view, differences between the strains could reflect  
202 varying levels of acceptable risk. Some conditions, such as consistently high levels of  
203 pathogens, may favor more cautious strategies with slower recovery while other condi-  
204 tions select for a faster response. Strategies may also diverge when different strains reg-  
205 ularly co-occur in the same habitat. A strain that frequently encounters a more cautious  
206 strain could benefit by recovering rapidly and establishing early. Timing developmental  
207 decisions to beat out other strains is not unheard of in nematodes; strains of the related  
208 nematode *Pristionchus pacificus* intentionally drive other strains of the same species into  
209 the dauer stage to stop them from feeding (**Bose et al., 2014**).

210 Dauer recovery differs among the bacterial treatments which is evidence for a more  
211 discerning strategy. Interestingly, the species does this in a way that is still consistent  
212 with the undiscerning strategy; no response is lower than the control but some bacte-  
213 ria can enhance recovery. Recovery will always occur, even in bad conditions, but can  
214 be accelerated upon detecting good conditions. What *C. elegans* interprets as "good,"  
215 however, is much more complicated than we had assumed. The worms' responses do  
216 not simply reflect the objective quality of the bacteria. The most favorable bacteria—that  
217 is, the one which elicited the greatest response—differs with worm strain. N2 responds  
218 highly to *E. coli* and so does CB4856, but CB4856 also responds highly to the detrimental  
219 bacterium *Serratia* sp. MYb239. In contrast, JU1395 shows little response to *E. coli* but  
220 strongly responds to *Providencia* sp. JUb39. These results indicate a lack of matching  
221 between recovery and a bacterium's objective quality. For instance, we demonstrated  
222 that *Serratia* sp. MYb239 rapidly kills all three worm strains and does not support grow-  
223 ing populations. Despite this, CB4756 and JU1395 unexpectedly have enhanced dauer  
224 recovery on the bacterium even though the newly recovered population will fail to grow  
225 on it. Similarly, *Providencia* sp. JUb39 is objectively a nutritious food source but CB4856  
226 has reduced recovery on it.

227 This lack of matching between food quality and response could have several explana-  
228 tions. Perhaps imperfect matching stems from the novelty of that food source. Certain  
229 combinations of worm strain and bacteria may never occur in nature or have occurred  
230 recently enough that selection has not had time to act (**Chew, 1977**). Imperfect matching  
231 could also occur when odorants are shared across many bacterial species, so selection  
232 on one worm-bacteria response spills over into other responses. It is also possible that  
233 worms can glean information about the bacterial community as a whole from interac-  
234 tions with individual species. Perhaps the presence of a specific bacterium in a commu-  
235 nity signals overall community health, substrate composition, or age of the patch (**John-  
236 son et al., 1997**); some species of coral, for instance, deduce their depth by sensing the  
237 composition of nearby bacterial communities (**Webster et al., 2004**). Finally, bacteria may  
238 release odorants to specifically manipulate bacteriovore behavior. Bacteria may be un-  
239 der selection to evade detection or, in the case of pathogens, to attract vulnerable hosts.  
240 Dauer behavior is known to be manipulated by at least one non-nematode organism, the  
241 beetle *Exomala orientalis* (**Cinkornpumin et al., 2014**), so manipulation by bacteria is cer-  
242 tainly feasible. Interestingly, *Serratia marcescens*, a congener of *Serratia* sp. MYb239, is  
243 strongly attractive to *C. elegans* despite its high pathogenicity (**Zhang et al., 2005**; **Pradel  
244 et al., 2007**), an observation that has puzzled many researchers.

245 Our results demonstrate that *C. elegans* dauers modulate their recovery based on the  
246 bacteria they detect in their new habitat. If these differences in recovery result from selec-



247 tion, this suggests that tying recovery to external cues still provides some kind of fitness  
248 benefit, even when the habitat structure bars dormant stages from dispersing to a better  
249 habitat in time or space. Perhaps the variety of strategies results from finer-scale fluctu-  
250 ations in habitat quality over the course of the rotting process. Additionally, conspecifics  
251 that frequently co-occur could maintain divergent strategies that vary in their levels of ac-  
252 ceptable risk or other characteristics. In conclusion, behavioral strategies do not simply  
253 evolve in response to strong environmental pressures. A full understanding must take  
254 into account an organism's ecological context, habitat structure, and life history, all of  
255 which contribute to the evolution of dormancy recovery strategies.

## 256 **Methods and Materials**

### 257 **Worms and bacteria**

258 The strains of *C. elegans* used for this project were N2, CB4856, and JU1395, which were  
259 received from the Caenorhabditis Genetics Center (CGC). N2 is the standard laboratory  
260 strain which was isolated in Bristol, UK in 1951 but not frozen until 1969. CB4856 was  
261 isolated in Hawaii in 1972 and JU1395 was isolated in Montsoreau, France in 2008.

262 *E. coli* OP50 was also received from the CGC. The four wild bacteria were all isolated  
263 from different sites in France between 2004 and 2009 (*Samuel et al., 2016*). *Providen-*  
264 *cia* sp. JUb39 and *Raoultella* sp. RIT712 were taken from rotting apples and *Serratia* sp.  
265 MYb239 was found in compost. These three species were acquired from Marie-Anne  
266 Félix at Institute of Biology of the Ecole Normale Supérieure (IBENS). *Pseudomonas* sp.  
267 SNU WT1 was isolated from the rotting stem of a butterbur plant and was acquired from  
268 Buck Samuel at Baylor College of Medicine. All worms and bacteria were frozen at -80 °C  
269 and aliquots thawed for each experimental replicate.

### 270 **Setting up experimental plates**

271 Approximately three weeks before the experiment, worms of each strain were thawed  
272 and placed on 100 mm *E. coli*-seeded Nematode Growth Medium (NGM) plates (*Stiernag-*  
273 *le, 2006*). These worms were incubated at 20 °C and expanded to seven plates per strain  
274 over the course of six days. The original thaw plates were discarded and the remaining  
275 six plates per strain were washed with water and the worms bleached using standard  
276 laboratory protocols to limit contamination (*Stiernagle, 2006*). Bleached eggs hatched  
277 overnight on a rocker at room temperature. The next day, hatched worms were placed  
278 onto six new *E. coli*-seeded NGM plates per strain. The worms were incubated at 20 °C  
279 for two weeks to induce dauer formation via starvation and overcrowding.

280 Experimental plates were 100 mm standard NGM plates. Three of these plates were  
281 used for the control treatment and contained an addition of 0.1% ampicillin, a broad-  
282 spectrum antibiotic used to prevent bacterial growth. Plates were assigned random num-  
283 ber IDs to blind the experiment and ensure unbiased counting later on. Five bottles of 50  
284 mL Luria Broth were inoculated with each of the five bacterial species and a sixth control  
285 bottle remained sterile. All bacteria were incubated overnight with *E. coli* at 37 °C and  
286 the other bacteria and the control at 25 °C.

287 The next day, bacterial absorbances were measured with a spectrophotometer and  
288 used with the equations in Table S2 to estimate the bacterial density in each broth. The  
289 eighteen experimental plates were seeded in six groups of three, one group per treat-

290 ment.  $5 \times 10^7$  CFU of each bacterial species were deposited onto the plates and water  
291 added to bring the final volume up to 500  $\mu$ L to ensure even spreading. For the three  
292 control plates, the volume of sterile broth deposited was equal to the largest volume of  
293 bacteria added for that replicate. The liquid was then spread in an even lawn across the  
294 plate and let dry in a vent hood.

295 After two weeks of starvation, worms were washed off of their plates and treated with  
296 1% sodium dodecyl sulfate (SDS) on a rocker table for 30 minutes. This treatment kills  
297 all worms except those in the dauer stage (*Cassada and Russell, 1975*). The worms were  
298 washed with water four times to remove the SDS and the final volume reduced to about  
299 2 mL. Three aliquots of a 1:100 dilution of these worms were scanned for live worms to  
300 estimate live dauer density in the undiluted tubes. 2000 dauers were then deposited in  
301 the center of experimental plates which were air dried in a vent hood and then stored at  
302 room temperature. The total time of exposure from worm deposition to worm removal  
303 was three hours.

### 304 **Worm counting**

305 The volume of worms placed in the center of experimental plates also contained the bod-  
306 ies of worms killed during the SDS wash, but most of the live worms explored the rest  
307 of the plate during the three-hour exposure. This central spot was cut out of the agar  
308 to leave only worms that were live at the time of deposition. Worms were then washed  
309 off each experimental plate, treated with 1% SDS for 30 minutes, and then washed four  
310 times with water to remove excess SDS. Ten 20  $\mu$ L aliquots per experimental plate were  
311 spotted onto an empty plate. Worms were then visually assayed for movement and  
312 given a maximum of three seconds to move before being declared dead. Moving worms  
313 were counted as having survived the SDS treatment, indicating that they had remained  
314 in dauer during the three hour exposure. Worms that did not move were counted as  
315 having been killed by the SDS wash, indicating that they had begun to recover from the  
316 dauer stage.

### 317 **Fecundity assay**

318 Synchronized L1 larvae of all three worm strains were acquired by following standard  
319 bleaching protocols and hatching the eggs overnight (*Stiernagle, 2006*). Populations of  
320 L1 larvae were spotted onto 60-mm NGM plates with either no bacteria (the negative  
321 control) or 100  $\mu$ L of overnight bacterial cultures. These plates were maintained at room  
322 temperature and scanned periodically for the presence of eggs and the general health  
323 of the population. The assay was done in triplicate.

### 324 **Statistical Analysis**

325 Logistic regression models were built in R version 3.6.2. Several models were compared  
326 using the likelihood-ratio test (*Hosmer and Lemeshow, 2000*). We retained all variables in  
327 the model because removing any of them significantly reduced the model's fit. Because  
328 worm strains had unique patterns of recovery (Fig. 3), we also introduced an interaction  
329 term between the variables "Worm Strain" and "Treatment" and retained it in the model  
330 because it significantly increased the model's fit.

## 331 **Bacterial genome sequencing**

332 Overnight cultures of each bacterial isolate were grown at 25 °C, with the exception of *E.*  
333 *coli* which was grown at 37 °C; one mL of each culture was placed in a 1.5mL tube and cen-  
334 trifuged to pellet the bacteria. Excess media was removed from the tube prior to gDNA  
335 extraction. Genomic DNA was extracted from each sample using a modified phenol-  
336 chloroform extraction (*Green and Sambrook, 2017*). One microgram of DNA from each  
337 sample was then prepared for multiplexed sequencing by attaching unique barcodes to  
338 each sample from the Oxford Nanopore Technologies (ONT) Native Barcoding Kit (EXP-  
339 NBD104). Following ligation of the barcode sequences; the DNA from each sample was  
340 pooled in equimolar amounts and prepared for sequencing using the ONT Ligation Se-  
341 quencing Kit (SQK-LSK109). The multiplexed sample was sequenced on a R9.4.1 flow cell  
342 using a GridION X5 platform. The sequence data were de-multiplexed and trimmed of  
343 barcode sequences using Porechop. Each genome was then assembled using Canu v1.8  
344 (*Koren et al., 2017*).

## 345 **Nematode DNA Extraction, Sequencing and Analysis**

346 *C. elegans* JU1395 worms were grown on several 100 mm NGM plates seeded with *E. coli*  
347 to achieve large population sizes. Worms were washed from the plates using M9 buffer,  
348 bleached using standard procedures, and the eggs hatched overnight (*Stiernagle, 2006*).  
349 We pelleted the worms, removed the supernatant, then flash-froze the pellet with liquid  
350 nitrogen. We then extracted the genomic DNA using a modified phenol-chloroform iso-  
351 lation (modified from *Green and Sambrook, 2017*). gDNA fragments were size selected  
352 using the Short Read Eliminator Kit from Circulomics Inc. One microgram of DNA was  
353 used to create a sequencing library with the ONT Ligation Sequencing Kit (SQK-SK109)  
354 and sequenced on a R9.4.1 RevD flow cell using a GridION X5 platform. Adapter se-  
355 quences were removed using Porechop and the genome assembled using Canu v 1.9  
356 (*Koren et al., 2017*). The genome was polished using Illumina paired-end reads gener-  
357 ated by the CeNDR project (*Cook et al., 2017*) and the Pilon software package (*Walker*  
358 *et al., 2014*). We used the BUSCO software v4.0.5 to estimate genic completeness with  
359 the nematoda\_odb10 dataset (*Seppey et al., 2019*). We used the gmap-gsnap software  
360 (*Wu and Nacu, 2010*) to align the N2 dauer gene transcripts to the CB4856 and JU1395  
361 genome sequences. Polymorphisms were identified with Samtools (*Li et al., 2009*) and  
362 Bcftools (*Li, 2011*).

## 363 **Accessions**

364 DNA sequence data generated during this project have been deposited with the National  
365 Center for Biotechnology Information under Bioproject PRJNA622250 for JU1395 and PR-  
366 JNA622270 for the microbial samples.

## 367 **Acknowledgments**

368 The authors would like to thank members of the Fierst lab, Amanda Gibson, Levi Mor-  
369 ran, Jason Pienaar, and Jesualdo Fuentes-Gonzalez for helpful discussion, critique and  
370 feedback.

371 Worms strains were provided by the CGC, which is funded by NIH Office of Research  
372 Infrastructure Programs (P40 OD010440). Wild bacteria were provided by Marie-Anne

373 Félix and Buck Samuel.

## 374 References

- 375 **Baskin CC**, Baskin JM. Seeds: ecology, biogeography, and evolution of dormancy and germination.  
376 San Diego: Academic Press; 1998.
- 377 **Bose N**, Meyer JM, Yim JJ, Mayer MG, Markov GV, Ogawa A, Schroeder FC, Sommer  
378 RJ. Natural variation in dauer pheromone production and sensing supports in-  
379 traspecific competition in nematodes. *Current Biology*. 2014; 24(13):1536–1541.  
380 <GotoISI>://WOS:000338799800030[https://ac.els-cdn.com/S0960982214006101/1-s2.0-S0960982214006101-main.pdf?\\_tid=727c4cf8-af6d-40eb-a004-d4b7da23302a&acdnt=](https://ac.els-cdn.com/S0960982214006101/1-s2.0-S0960982214006101-main.pdf?_tid=727c4cf8-af6d-40eb-a004-d4b7da23302a&acdnt=1551208088_836fadd7c4a868cf77711e67371baccb)  
381 [1551208088\\_836fadd7c4a868cf77711e67371baccb](https://ac.els-cdn.com/S0960982214006101/1-s2.0-S0960982214006101-main.pdf?_tid=727c4cf8-af6d-40eb-a004-d4b7da23302a&acdnt=1551208088_836fadd7c4a868cf77711e67371baccb), doi: 10.1016/j.cub.2014.05.045.
- 382
- 383 **Burke RD**. Pheromones and the Gregarious Settlement of Marine Invertebrate Larvae. *Bulletin of*  
384 *Marine Science*. 1986; 39(2):323–331. <GotoISI>://WOS:A1986F808300014.
- 385 **Cassada RC**, Russell RL. Dauerlarva, a post-embryonic developmental variant of  
386 nematode *Caenorhabditis elegans*. *Developmental Biology*. 1975; 46(2):326–342.  
387 <GotoISI>://WOS:A1975AS22600008[https://ac.els-cdn.com/0012160675901098/1-s2.0-](https://ac.els-cdn.com/0012160675901098/1-s2.0-0012160675901098-main.pdf?_tid=9bc022c7-5730-49f0-a397-acf3834a6c8e&acdnt=1551208083_e602684972f81da0af0c4920ab2edd4f)  
388 [0012160675901098-main.pdf?\\_tid=9bc022c7-5730-49f0-a397-acf3834a6c8e&acdnt=](https://ac.els-cdn.com/0012160675901098/1-s2.0-0012160675901098-main.pdf?_tid=9bc022c7-5730-49f0-a397-acf3834a6c8e&acdnt=1551208083_e602684972f81da0af0c4920ab2edd4f)  
389 [1551208083\\_e602684972f81da0af0c4920ab2edd4f](https://ac.els-cdn.com/0012160675901098/1-s2.0-0012160675901098-main.pdf?_tid=9bc022c7-5730-49f0-a397-acf3834a6c8e&acdnt=1551208083_e602684972f81da0af0c4920ab2edd4f), doi: Doi 10.1016/0012-1606(75)90109-8.
- 390 **Chew FS**. Coevolution of Pierid Butterflies and Their Cruciferous Foodplants .2. Distribution of Eggs  
391 on Potential Foodplants. *Evolution*. 1977; 31(3):568–579. <GotoISI>://WOS:A1977EE35300008,  
392 doi: Doi 10.2307/2407522.
- 393 **Cinkornpumin JK**, Wisidagama DR, Rapoport V, Go JL, Dieterich C, Wang XY, Sommer RJ, Hong RL. A  
394 host beetle pheromone regulates development and behavior in the nematode *Pristionchus paci-*  
395 *ficus*. *Elife*. 2014; 3. <GotoISI>://WOS:000343422100003, doi: ARTN e03229 10.7554/eLife.03229.
- 396 **Cook DE**, Zdraljevic S, Roberts JP, Andersen EC. CeNDR, the *Caenorhabditis elegans* natural diver-  
397 sity resource. *Nucleic Acids Res*. 2017; 45(D1):D650–D657. [https://www.ncbi.nlm.nih.gov/pubmed/](https://www.ncbi.nlm.nih.gov/pubmed/27701074)  
398 [27701074](https://www.ncbi.nlm.nih.gov/pubmed/27701074), doi: 10.1093/nar/gkw893.
- 399 **Ellenby C**. Desiccation survival of infective larva of *Haemonchus contortus*. *Journal of Experimental*  
400 *Biology*. 1968; 49(2):469–. <GotoISI>://WOS:A1968C029400017[http://jeb.biologists.org/content/](http://jeb.biologists.org/content/jexbio/49/2/469.full.pdfhttps://jeb.biologists.org/content/jexbio/49/2/469.full.pdf)  
401 [jexbio/49/2/469.full.pdfhttps://jeb.biologists.org/content/jexbio/49/2/469.full.pdf](http://jeb.biologists.org/content/jexbio/49/2/469.full.pdfhttps://jeb.biologists.org/content/jexbio/49/2/469.full.pdf).
- 402 **Felix MA**, Braendle C. The natural history of *Caenorhabditis ele-*  
403 *gans*. *Current Biology*. 2010; 20(22):R965–R969. <GotoISI>://WOS:  
404 000284923700009[https://ac.els-cdn.com/S0960982210011681/1-s2.0-S0960982210011681-main.](https://ac.els-cdn.com/S0960982210011681/1-s2.0-S0960982210011681-main.pdf?_tid=159d62d4-28bd-49ae-badd-cf7624d17aa5&acdnt=1551208404_c5b919d5924ba073a8748c42fd7b9a58)  
405 [pdf?\\_tid=159d62d4-28bd-49ae-badd-cf7624d17aa5&acdnt=1551208404\\_](https://ac.els-cdn.com/S0960982210011681/1-s2.0-S0960982210011681-main.pdf?_tid=159d62d4-28bd-49ae-badd-cf7624d17aa5&acdnt=1551208404_c5b919d5924ba073a8748c42fd7b9a58)  
406 [c5b919d5924ba073a8748c42fd7b9a58](https://ac.els-cdn.com/S0960982210011681/1-s2.0-S0960982210011681-main.pdf?_tid=159d62d4-28bd-49ae-badd-cf7624d17aa5&acdnt=1551208404_c5b919d5924ba073a8748c42fd7b9a58), doi: DOI 10.1016/j.cub.2010.09.050.
- 407 **Ferrari C**, Salle R, Callemeyn-Torre N, Jovelin R, Cutter AD, Braendle C. Ephemeral-habitat col-  
408 onization and neotropical species richness of *Caenorhabditis* nematodes. *Bmc Ecology*. 2017;  
409 17. <GotoISI>://WOS:000418844900003[https://bmcecol.biomedcentral.com/track/pdf/10.1186/](https://bmcecol.biomedcentral.com/track/pdf/10.1186/s12898-017-0150-z)  
410 [s12898-017-0150-z](https://bmcecol.biomedcentral.com/track/pdf/10.1186/s12898-017-0150-z), doi: ARTN 43 10.1186/s12898-017-0150-z.
- 411 **Finch-Savage WE**, Leubner-Metzger G. Seed dormancy and the control of germination. *New Phy-*  
412 *tologist*. 2006; 171(3):501–523. <GotoISI>://WOS:000239010200007[https://nph.onlinelibrary.wiley.](https://nph.onlinelibrary.wiley.com/doi/full/10.1111/j.1469-8137.2006.01787.x)  
413 [com/doi/full/10.1111/j.1469-8137.2006.01787.x](https://nph.onlinelibrary.wiley.com/doi/full/10.1111/j.1469-8137.2006.01787.x), doi: 10.1111/j.1469-8137.2006.01787.x.
- 414 **Frezal L**, Felix MA. *C. elegans* outside the Petri dish. *Elife*. 2015; 4. <GotoISI>://WOS:  
415 000352021700001, doi: ARTN e05849 10.7554/eLife.05849.

- 416 **Girard LR**, Fiedler TJ, Harris TW, Carvalho F, Antoshechkin I, Han M, Sternberg PW, Stein LD, Chal-  
417 fie M. WormBook: the online review of *Caenorhabditis elegans* biology. *Nucleic Acids Re-*  
418 *search*. 2007; 35:D472–D475. <GotoISI>://WOS:000243494600096https://www.ncbi.nlm.nih.gov/  
419 [pmc/articles/PMC1669767/pdf/gkl894.pdf](https://www.ncbi.nlm.nih.gov/pmc/articles/PMC1669767/pdf/gkl894.pdf), doi: 10.1093/nar/gkl894.
- 420 **Golden JW**, Riddle DL. A gene affecting production of the *Caenorhabditis elegans* dauer-inducing  
421 pheromone. *Mol Gen Genet*. 1985; 198(3):534–6. <https://www.ncbi.nlm.nih.gov/pubmed/3859733>,  
422 doi: 10.1007/bf00332953.
- 423 **Green MR**, Sambrook J. Isolation of High-Molecular-Weight DNA Using Organic Solvents. *Cold*  
424 *Spring Harb Protoc*. 2017; 2017(4):pdb prot093450. [https://www.ncbi.nlm.nih.gov/pubmed/](https://www.ncbi.nlm.nih.gov/pubmed/28373491)  
425 [28373491](https://www.ncbi.nlm.nih.gov/pubmed/28373491), doi: 10.1101/pdb.prot093450.
- 426 **Harrington L**, Fabricius K, De’Ath G, Negri A. Recognition and selection of settlement substrata  
427 determine post-settlement survival in corals. *Ecology*. 2004; 85(12):3428–3437.
- 428 **Hosmer DW**, Lemeshow S. *Applied Logistic Regression*. 2 ed. Wiley-Interscience Publication; 2000.
- 429 **Johnson C**, Lewis T, Nicols D, Degnan B. Bacterial induction of settlement and metamorphosis in  
430 marine invertebrates. In: *Proc 8th Int Coral Reef Sym*; 1997. p. 1219–1224.
- 431 **Keough MJ**, Downes BJ. Recruitment of Marine-Invertebrates - the Role of Active Larval Choices  
432 and Early Mortality. *Oecologia*. 1982; 54(3):348–352. <GotoISI>://WOS:A1982PF18500010https://  
433 [link.springer.com/article/10.1007%2FBF00380003](https://link.springer.com/article/10.1007%2FBF00380003), doi: Doi 10.1007/Bf00380003.
- 434 **Kim C**, Kim J, Kim S, Cook DE, Andersen EC, Lee J. Long-read sequencing reveals intra-species toler-  
435 ance of substantial structural variations and new subtelomere formation in *C. elegans*. *Genome*  
436 *Research*. 2019; 29:1023–1035.
- 437 **Kiontke K**, Sudhaus W. In: Fitch DHA, editor. *Ecology of Caenorhabditis species The C. elegans*  
438 *Research Community*; 2006. .
- 439 **Klass M**, Hirsh D. Non-Aging Developmental Variant of *Caenorhabditis elegans*. *Nature*.  
440 1976; 260(5551):523–525. <GotoISI>://WOS:A1976BM12600035https://www.nature.com/articles/  
441 [260523a0](https://www.nature.com/articles/260523a0), doi: DOI 10.1038/260523a0.
- 442 **Koren S**, Walenz BP, Berlin K, Miller JR, Bergman NH, Phillippy AM. Canu: scalable and accurate  
443 long-read assembly via adaptive k-mer weighting and repeat separation. *Genome Res*. 2017;  
444 27(5):722–736. <https://www.ncbi.nlm.nih.gov/pubmed/28298431>, doi: 10.1101/gr.215087.116.
- 445 **Lee D**, Zdraljevic S, Cook DE, Frezal L, Hsu JC, Sterken MG, Riksens JAG, Wang J, Kammenga JE, Braen-  
446 dle C, Felix MA, Schroeder FC, Andersen EC. Selection and gene flow shape niche-associated vari-  
447 ation in pheromone response. *Nature Ecology Evolution*. 2019; 3(10):1455–1463. <GotoISI>:  
448 [/WOS:000488304100019https://www.nature.com/articles/s41559-019-0982-3](https://www.nature.com/articles/s41559-019-0982-3), doi: 10.1038/s41559-  
449 019-0982-3.
- 450 **Li H**. A statistical framework for SNP calling, mutation discovery, association mapping and popula-  
451 tion genetical parameter estimation from sequencing data. *Bioinformatics*. 2011; 27(21):2987–  
452 93. <https://www.ncbi.nlm.nih.gov/pubmed/21903627>, doi: 10.1093/bioinformatics/btr509.
- 453 **Li H**, Handsaker B, Wysoker A, Fennell T, Ruan J, Homer N, Marth G, Abecasis G, Durbin R, Genome  
454 Project Data Processing S. The Sequence Alignment/Map format and SAMtools. *Bioinformatics*.  
455 2009; 25(16):2078–9. <https://www.ncbi.nlm.nih.gov/pubmed/19505943>, doi: 10.1093/bioinformat-  
456 ics/btp352.
- 457 **Pawlik JR**. Chemical Ecology of the Settlement of Benthic Marine-Invertebrates. *Oceanography*  
458 *and Marine Biology*. 1992; 30:273–335. <GotoISI>://WOS:A1992LT27600004.

- 459 **Pradel E**, Zhang Y, Pujol N, Matsuyama T, Bargmann CI, Ewbank JJ. Detection and avoidance of a nat-  
460 ural product from the pathogenic bacterium *Serratia marcescens* by *Caenorhabditis elegans*. Pro-  
461 ceedings of the National Academy of Sciences of the United States of America. 2007; 104(7):2295-  
462 2300. <GotoISI>://WOS:000244438500047<https://www.pnas.org/content/pnas/104/7/2295.full.pdf>,  
463 doi: 10.1073/pnas.0610281104.
- 464 **Raimondi PT**. Settlement Cues and Determination of the Vertical Limit of an Intertidal Barnacle.  
465 Ecology. 1988; 69(2):400-407. <GotoISI>://WOS:A1988M749600011<https://esajournals.onlinelibrary.wiley.com/doi/abs/10.2307/1940438>, doi: Doi 10.2307/1940438.
- 466
- 467 **Samuel BS**, Rowedder H, Braendle C, Felix MA, Ruvkun G. *Caenorhabditis elegans* responses to  
468 bacteria from its natural habitats. Proceedings of the National Academy of Sciences of the United  
469 States of America. 2016; 113(27):E3941-E3949. <GotoISI>://WOS:000379021700018<https://www.pnas.org/content/pnas/113/27/E3941.full.pdf>, doi: 10.1073/pnas.1607183113.
- 470
- 471 **Seppey M**, Manni M, Zdobnov EM. In: Kollmar M, editor. BUSCO: Assessing Genome Assembly and  
472 Annotation Completeness. New York, NY: Humana; 2019. .
- 473 **Stiernagle T**. In: Hope I, editor. Maintenance of *C. elegans* Oxford University Press; 2006. p. 51-67.
- 474 **Walker BJ**, Abeel T, Shea T, Priest M, Abouelliel A, Sakthikumar S, Cuomo CA, Zeng Q, Wortman J,  
475 Young SK, Earl AM. Pilon: an integrated tool for comprehensive microbial variant detection and  
476 genome assembly improvement. PLoS One. 2014; 9(11):e112963. <https://www.ncbi.nlm.nih.gov/pubmed/25409509>, doi: 10.1371/journal.pone.0112963.
- 477
- 478 **Webster NS**, Smith LD, Heyward AJ, Watts JEM, Webb RI, Blackall LL, Negri AP. Metamorphosis of  
479 a scleractinian coral in response to microbial biofilms. Applied and Environmental Microbiology.  
480 2004; 70(2):1213-1221.
- 481 **Wu TD**, Nacu S. Fast and SNP-tolerant detection of complex variants and splicing in short  
482 reads. Bioinformatics. 2010; 26(7):873-81. <https://www.ncbi.nlm.nih.gov/pubmed/20147302>, doi:  
483 10.1093/bioinformatics/btq057.
- 484 **Zhang Y**, Lu H, Bargmann CI. Pathogenic bacteria induce aversive olfactory learning in *Caenorhabdi-*  
485 *tis elegans*. Nature. 2005; 438(7065):179-84. <https://www.ncbi.nlm.nih.gov/pubmed/16281027><https://www.nature.com/articles/nature04216>, doi: 10.1038/nature04216.
- 486

487 Supplement

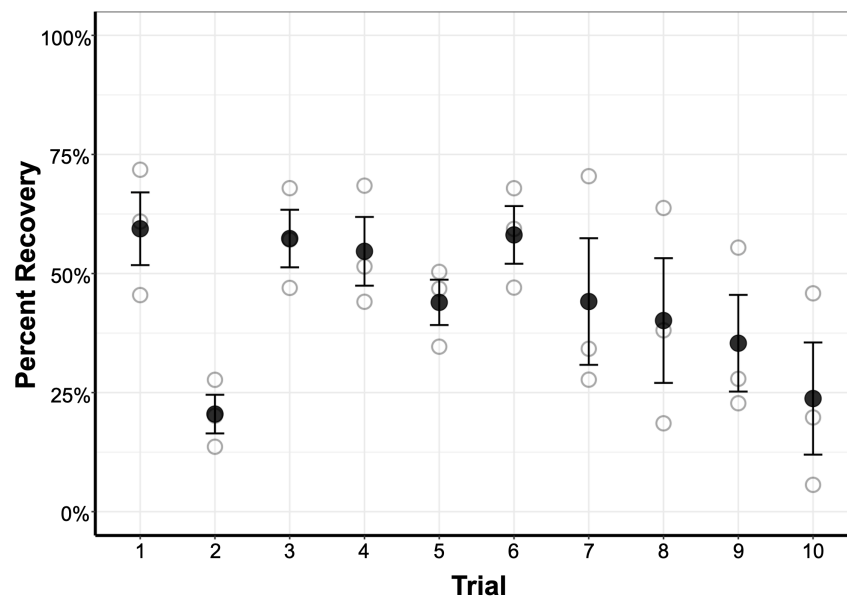

**Figure S1.** Mean recovery across the ten trials. Faded points are average values for each worm strain. Error bars show standard error of the mean.

**Table S1.** Estimated odds ratios for each value of the variables "Trial," "Technical Replicate," and "LB".

| Variable                   | Value           | Odds Ratio | 95 % CI      |
|----------------------------|-----------------|------------|--------------|
| <b>Trial</b>               |                 |            |              |
|                            | 1               | 1.00       |              |
|                            | 2               | 0.18       | (0.16, 0.20) |
|                            | 3               | 0.87       | (0.76, 1.00) |
|                            | 4               | 0.84       | (0.74, 0.97) |
|                            | 5               | 0.57       | (0.49, 0.66) |
|                            | 6               | 1.03       | (0.89, 1.19) |
|                            | 7               | 0.57       | (0.50, 0.66) |
|                            | 8               | 0.49       | (0.43, 0.57) |
|                            | 9               | 0.36       | (0.31, 0.42) |
|                            | 10              | 0.20       | (0.17, 0.23) |
| <b>Technical Replicate</b> |                 |            |              |
|                            | 1               | 1.00       |              |
|                            | 2               | 0.96       | (0.84, 1.10) |
|                            | 3               | 1.02       | (0.89, 1.17) |
|                            | 4               | 0.88       | (0.77, 1.01) |
|                            | 5               | 0.91       | (0.80, 1.04) |
|                            | 6               | 0.89       | (0.77, 1.02) |
|                            | 7               | 0.89       | (0.77, 1.01) |
|                            | 8               | 0.84       | (0.73, 0.96) |
|                            | 9               | 0.88       | (0.77, 1.01) |
|                            | 10              | 0.78       | (0.68, 0.90) |
| <b>LB</b>                  |                 |            |              |
|                            | per 100 $\mu$ L | 1.06       | (1.02, 1.10) |

**Table S2.** Equations used to convert absorbance to bacterial density where x is the absorbance and y is CFU/mL

| Species                        | Equation                                                        |
|--------------------------------|-----------------------------------------------------------------|
| <i>Escherichia coli</i> OP50   | $y = (1 \times 10^9)(x^2) - (1 \times 10^8)(x) + 3 \times 10^6$ |
| <i>Raoultella</i> sp. RIT712   | $y = (2 \times 10^9)(x^{1.9644})$                               |
| <i>Providencia</i> sp. JUb39   | $y = 12293e^{27.588x}$                                          |
| <i>Serratia</i> sp. MYb239     | $y = (2 \times 10^9)(x^{2.46})$                                 |
| <i>Pseudomonas</i> sp. SNU WT1 | $y = (2 \times 10^9)(x^{2.1034})$                               |



488 **Table S3.** *C. elegans* dauer genes

489

490 Pheromone synthesis:

491 *daf-22*

492

493 Guanylyl cyclase pathway:

494 *daf-11*

495 *daf-1*

496 *daf-4*

497 *daf-7*

498 *daf-8*

499 *daf-14*

500 *tax-2*

501 *tax-4*

502 *daf-21*

503

504 TGF $\beta$ -like pathway:

505 *daf-3*

506 *daf-5*

507 *scd-1*

508 *scd-2*

509 *scd-3*

510 *egl-4*

511 *bra-1*

512 *kin-8*

513

514 Insulin-like pathway:

515 *daf-2*

516 *daf-23*

517 *daf-16*

518 *ins-1*

519 *ins-2*

520 ... through

521 *ins-40*

522

523 Steroid hormone pathway:

524 *daf-9*

525 *daf-12*

526 *ncr-1*

527 *ncr-2*

528

529 *Serratia* interactions:

530 *tol-1*

531 **Table S4.** *C. elegans* dauer gene transcripts

532

533 NM\_001025812.3 *Caenorhabditis elegans* TOLI (*Drosophila*) family (*tol-1*), partial mRNA

534 NM\_001025977.3 *Caenorhabditis elegans* Serine/threonine-protein kinase receptor  
535 (*daf-4*), partial mRNA

536 NM\_001025978.2 *Caenorhabditis elegans* Receptor protein serine/threonine kinase  
537 (*daf-4*), partial mRNA

538 NM\_001026422.4 *Caenorhabditis elegans* Forkhead box protein O (*daf-16*), partial  
539 mRNA

540 NM\_001026423.4 *Caenorhabditis elegans* Forkhead box protein O (*daf-16*), partial  
541 mRNA

542 NM\_001026424.4 *Caenorhabditis elegans* Forkhead box protein O (*daf-16*), partial  
543 mRNA

544 NM\_001026425.3 *Caenorhabditis elegans* Forkhead box protein O (*daf-16*), partial  
545 mRNA

546 NM\_001026426.2 *Caenorhabditis elegans* Forkhead box protein O (*daf-16*), partial  
547 mRNA

548 NM\_001026427.4 *Caenorhabditis elegans* Forkhead box protein O (*daf-16*), partial  
549 mRNA

550 NM\_001026675.1 *Caenorhabditis elegans* INSulin related (*ins-29*), partial mRNA

551 NM\_001026676.1 *Caenorhabditis elegans* INSulin related (*ins-27*), partial mRNA

552 NM\_001026678.1 *Caenorhabditis elegans* INSulin related (*ins-25*), partial mRNA

553 NM\_001026679.1 *Caenorhabditis elegans* INSulin related (*ins-28*), partial mRNA

554 NM\_001026791.2 *Caenorhabditis elegans* INSulin related (*ins-13*), partial mRNA

555 NM\_001026792.3 *Caenorhabditis elegans* INSulin related (*ins-12*), partial mRNA

556 NM\_001026793.1 *Caenorhabditis elegans* INSulin related (*ins-38*), partial mRNA

557 NM\_001026982.1 *Caenorhabditis elegans* INSulin related (*ins-14*), partial mRNA

558 NM\_001026983.1 *Caenorhabditis elegans* INSulin related (*ins-15*), partial mRNA

559 NM\_001027168.1 *Caenorhabditis elegans* INSulin related (*ins-19*), partial mRNA

560 NM\_001027358.4 *Caenorhabditis elegans* INSulin related (*ins-20*), partial mRNA

561 NM\_001027670.1 *Caenorhabditis elegans* INSulin related (*ins-16*), partial mRNA

562 NM\_001027988.4 *Caenorhabditis elegans* Cell surface receptor *daf-1* (*daf-1*), partial  
563 mRNA

564 NM\_001027989.3 *Caenorhabditis elegans* Cell surface receptor *daf-1* (*daf-1*), partial  
565 mRNA

566 NM\_001028052.2 *Caenorhabditis elegans* cGMP-dependent protein kinase *egl-4* (*egl-4*),  
567 partial mRNA

568 NM\_001028053.2 *Caenorhabditis elegans* cGMP-dependent protein kinase *egl-4* (*egl-4*),  
569 partial mRNA

570 NM\_001028954.1 *Caenorhabditis elegans* INSulin related (*ins-10*), partial mRNA

571 NM\_001029191.1 *Caenorhabditis elegans* INSulin related (*ins-9*), partial mRNA

572 NM\_001029376.4 *Caenorhabditis elegans* Nuclear hormone receptor family member  
573 *daf-12* (*daf-12*), partial mRNA

574 NM\_001029377.3 *Caenorhabditis elegans* Nuclear hormone receptor family member  
575 *daf-12* (*daf-12*), partial mRNA

576 NM\_001029378.1 *Caenorhabditis elegans* Nuclear hormone receptor family member  
577 daf-12 (daf-12), partial mRNA  
578 NM\_001029433.3 *Caenorhabditis elegans* Dwarfism sma (daf-3), partial mRNA  
579 NM\_001029434.2 *Caenorhabditis elegans* Dwarfism sma (daf-3), partial mRNA  
580 NM\_001029732.1 *Caenorhabditis elegans* Cytochrome P450 daf-9 (daf-9), partial mRNA  
581 NM\_001047774.2 *Caenorhabditis elegans* Nuclear hormone receptor family member  
582 daf-12 (daf-12), partial mRNA  
583 NM\_001264561.1 *Caenorhabditis elegans* Forkhead box protein O (daf-16), partial  
584 mRNA  
585 NM\_001264563.1 *Caenorhabditis elegans* Forkhead box protein O (daf-16), partial  
586 mRNA  
587 NM\_001264650.1 *Caenorhabditis elegans* INSulin related (ins-36), partial mRNA  
588 NM\_001264651.1 *Caenorhabditis elegans* INSulin related (ins-36), partial mRNA  
589 NM\_001268487.1 *Caenorhabditis elegans* INSulin related (ins-8), partial mRNA  
590 NM\_001268488.1 *Caenorhabditis elegans* INSulin related (ins-7), partial mRNA  
591 NM\_001268489.1 *Caenorhabditis elegans* Probable insulin-like peptide beta-type 4  
592 (ins-7), partial mRNA  
593 NM\_001268546.1 *Caenorhabditis elegans* Uncharacterized protein (daf-14), partial  
594 mRNA  
595 NM\_001268547.1 *Caenorhabditis elegans* Uncharacterized protein (daf-14), partial  
596 mRNA  
597 NM\_001307520.1 *Caenorhabditis elegans* Uncharacterized protein (egl-4), partial mRNA  
598 NM\_001307521.1 *Caenorhabditis elegans* cGMP-dependent protein kinase (egl-4), par-  
599 tial mRNA  
600 NM\_001312987.1 *Caenorhabditis elegans* Receptor protein-tyrosine kinase (daf-2), par-  
601 tial mRNA  
602 NM\_001312988.1 *Caenorhabditis elegans* Receptor protein-tyrosine kinase (daf-2), par-  
603 tial mRNA  
604 NM\_001312989.1 *Caenorhabditis elegans* Receptor protein-tyrosine kinase (daf-2), par-  
605 tial mRNA  
606 NM\_001312990.1 *Caenorhabditis elegans* Uncharacterized protein (daf-2), partial mRNA  
607 NM\_001312991.1 *Caenorhabditis elegans* Uncharacterized protein (daf-2), partial mRNA  
608 NM\_001313082.1 *Caenorhabditis elegans* Uncharacterized protein (daf-11), partial  
609 mRNA  
610 NM\_001313412.1 *Caenorhabditis elegans* Dwarfism sma (daf-3), partial mRNA  
611 NM\_001313413.1 *Caenorhabditis elegans* Dwarfism sma (daf-3), partial mRNA  
612 NM\_001313414.1 *Caenorhabditis elegans* Dwarfism sma (daf-3), partial mRNA  
613 NM\_001313415.1 *Caenorhabditis elegans* Dwarfism sma (daf-3), partial mRNA  
614 NM\_001313416.1 *Caenorhabditis elegans* Dwarfism sma (daf-3), partial mRNA  
615 NM\_001313417.1 *Caenorhabditis elegans* Uncharacterized protein (daf-3), partial mRNA  
616 NM\_001313473.1 *Caenorhabditis elegans* Uncharacterized protein (daf-16), partial  
617 mRNA  
618 NM\_001313474.1 *Caenorhabditis elegans* Uncharacterized protein (daf-16), partial  
619 mRNA  
620 NM\_001313504.1 *Caenorhabditis elegans* Uncharacterized protein (daf-16), partial  
621 mRNA

622 NM\_001313505.1 *Caenorhabditis elegans* Uncharacterized protein (daf-16), partial  
623 mRNA  
624 NM\_001322590.1 *Caenorhabditis elegans* Serine/threonine-protein kinase receptor  
625 (daf-4), partial mRNA  
626 NM\_001330884.1 *Caenorhabditis elegans* Receptor protein serine/threonine kinase  
627 (daf-4), partial mRNA  
628 NM\_059830.5 *Caenorhabditis elegans* INSulin related (ins-18), partial mRNA  
629 NM\_059920.3 *Caenorhabditis elegans* Dwarfism sma (daf-8), partial mRNA  
630 NM\_060026.5 *Caenorhabditis elegans* Uncharacterized protein (tax-2), partial mRNA  
631 NM\_060988.3 *Caenorhabditis elegans* INSulin related (ins-33), partial mRNA  
632 NM\_061042.5 *Caenorhabditis elegans* INSulin related (ins-24), partial mRNA  
633 NM\_061043.3 *Caenorhabditis elegans* INSulin related (ins-30), partial mRNA  
634 NM\_061044.4 *Caenorhabditis elegans* INSulin related (ins-26), partial mRNA  
635 NM\_062053.1 *Caenorhabditis elegans* INSulin related (ins-31), partial mRNA  
636 NM\_062254.1 *Caenorhabditis elegans* INSulin related (ins-32), partial mRNA  
637 NM\_062670.1 *Caenorhabditis elegans* B-chain-like peptide (ins-11), partial mRNA  
638 NM\_062793.1 *Caenorhabditis elegans* Probable insulin-like peptide beta-type 2 (ins-  
639 2), partial mRNA  
640 NM\_062794.5 *Caenorhabditis elegans* Probable insulin-like peptide beta-type 3 (ins-  
641 3), partial mRNA  
642 NM\_062795.1 *Caenorhabditis elegans* Probable insulin-like peptide beta-type 1 (ins-  
643 4), partial mRNA  
644 NM\_062796.4 *Caenorhabditis elegans* Putative insulin-like peptide beta-type 6 (ins-5),  
645 partial mRNA  
646 NM\_062797.1 *Caenorhabditis elegans* Probable insulin-like peptide beta-type 5 (ins-  
647 6), partial mRNA  
648 NM\_064238.3 *Caenorhabditis elegans* Non-specific lipid-transfer protein-like 2 (daf-  
649 22), partial mRNA  
650 NM\_064501.2 *Caenorhabditis elegans* INSulin related (ins-37), partial mRNA  
651 NM\_064540.5 *Caenorhabditis elegans* Uncharacterized protein (daf-5), partial mRNA  
652 NM\_064864.4 *Caenorhabditis elegans* Dauer larva development regulatory growth  
653 factor daf-7 (daf-7), partial mRNA  
654 NM\_065249.4 *Caenorhabditis elegans* Insulin-like receptor subunit beta (daf-2), par-  
655 tial mRNA  
656 NM\_065510.4 *Caenorhabditis elegans* INSulin related (ins-17), partial mRNA  
657 NM\_065810.5 *Caenorhabditis elegans* Cell surface receptor daf-4 (daf-4), partial mRNA  
658 NM\_066412.3 *Caenorhabditis elegans* Niemann-Pick C1 protein homolog 2 (ncr-2),  
659 partial mRNA  
660 NM\_066632.4 *Caenorhabditis elegans* Cyclic nucleotide-gated cation channel (tax-4),  
661 partial mRNA  
662 NM\_066641.4 *Caenorhabditis elegans* Suppressor of activated egl-4 protein 2 (saeg-2),  
663 partial mRNA  
664 NM\_066821.2 *Caenorhabditis elegans* Probable insulin-like peptide alpha-type 1 (ins-  
665 21), partial mRNA  
666 NM\_066822.3 *Caenorhabditis elegans* Probable insulin-like peptide alpha-type 2 (ins-  
667 22), partial mRNA

668 NM\_066823.1 *Caenorhabditis elegans* Probable insulin-like peptide alpha-type 3 (ins-  
669 23), partial mRNA  
670 NM\_067740.4 *Caenorhabditis elegans* cGMP-dependent protein kinase egl-4 (egl-4),  
671 partial mRNA  
672 NM\_067741.3 *Caenorhabditis elegans* cGMP-dependent protein kinase egl-4 (egl-4),  
673 partial mRNA  
674 NM\_069525.4 *Caenorhabditis elegans* INSulin related (ins-1), partial mRNA  
675 NM\_070301.2 *Caenorhabditis elegans* INSulin related (ins-34), partial mRNA  
676 NM\_072284.3 *Caenorhabditis elegans* ALK tyrosine kinase receptor homolog scd-2  
677 (scd-2), partial mRNA  
678 NM\_073368.7 *Caenorhabditis elegans* Suppressor of activated egl-4 protein 1 (saeg-1),  
679 partial mRNA  
680 NM\_073559.5 *Caenorhabditis elegans* Receptor-type guanylate cyclase daf-11 (daf-  
681 11), partial mRNA  
682 NM\_074225.3 *Caenorhabditis elegans* Heat shock protein 90 (daf-21), partial mRNA  
683 NM\_075525.3 *Caenorhabditis elegans* INSulin related (ins-35), partial mRNA  
684 NM\_075760.4 *Caenorhabditis elegans* Dwarfism sma (daf-3), partial mRNA  
685 NM\_075846.3 *Caenorhabditis elegans* INSulin related (ins-39), partial mRNA  
686 NM\_076370.3 *Caenorhabditis elegans* Niemann-Pick C1 protein homolog 1 (ncr-1),  
687 partial mRNA  
688 NM\_077876.3 *Caenorhabditis elegans* BMP Receptor Associated protein family (bra-  
689 1), partial mRNA  
690 NM\_171279.3 *Caenorhabditis elegans* cGMP-dependent protein kinase egl-4 (egl-4),  
691 partial mRNA  
692 NM\_171280.2 *Caenorhabditis elegans* cGMP-dependent protein kinase egl-4 (egl-4),  
693 partial mRNA  
694 NM\_171699.4 *Caenorhabditis elegans* Cytochrome P450 daf-9 (daf-9), partial mRNA  
695 NM\_171785.3 *Caenorhabditis elegans* Suppressor of Constitutive Dauer formation  
696 (scd-1), partial mRNA  
697 NM\_171974.4 *Caenorhabditis elegans* Suppressor of Constitutive Dauer formation  
698 (scd-1), partial mRNA  
699 NR\_131392.1 *Caenorhabditis elegans* Non-coding transcript of protein-coding gene  
700 ins-36 (ins-36), miscRNA  
701 NR\_131589.1 *Caenorhabditis elegans* Non-coding transcript of protein-coding gene  
702 ins-8 (ins-8), miscRNA  
703 NR\_132448.1 *Caenorhabditis elegans* Non-coding transcript of protein-coding gene  
704 daf-2 (daf-2), miscRNA  
705 NR\_132532.1 *Caenorhabditis elegans* Non-coding transcript of protein-coding gene  
706 daf-11 (daf-11), miscRNA

**Table S5. *C. elegans* CB4856 dauer transcript polymorphisms**

| 707 | Contig     | Position | ID    | Reference                                              | Alternate | Transcript |
|-----|------------|----------|-------|--------------------------------------------------------|-----------|------------|
| 708 |            |          |       |                                                        |           |            |
| 709 |            |          |       |                                                        |           |            |
| 710 | CP038187.1 | 508877   | . A G | NM_001025812.3                                         |           |            |
| 711 | CP038187.1 | 509442   | . A G | NM_001025812.3                                         |           |            |
| 712 | CP038187.1 | 14409957 | . C A | NM_001026675.1,NM_001026676.1,NM_001026678.1,          |           |            |
| 713 |            |          |       | NM_001026679.1                                         |           |            |
| 714 | CP038187.1 | 14432590 | . C T | NM_001026675.1,NM_001026676.1,NM_001026678.1,          |           |            |
| 715 |            |          |       | NM_001026679.1                                         |           |            |
| 716 | CP038188.1 | 3211977  | . C T | NM_001027168.1                                         |           |            |
| 717 | CP038188.1 | 3211984  | . G A | NM_001027168.1                                         |           |            |
| 718 | CP038188.1 | 3212158  | . C T | NM_001027168.1                                         |           |            |
| 719 | CP038188.1 | 3212167  | . G A | NM_001027168.1                                         |           |            |
| 720 | CP038188.1 | 3946515  | . C G | NM_062254.1                                            |           |            |
| 721 | CP038188.1 | 5920857  | . A G | NM_001026793.1                                         |           |            |
| 722 | CP038188.1 | 5920858  | . C T | NM_001026793.1                                         |           |            |
| 723 | CP038188.1 | 5934734  | . G C | NM_001026791.2                                         |           |            |
| 724 | CP038188.1 | 6381928  | . A C | NM_062796.4                                            |           |            |
| 725 | CP038188.1 | 12887591 | . T C | NM_064238.3                                            |           |            |
| 726 | CP038188.1 | 14564758 | . C T | NM_064540.5                                            |           |            |
| 727 | CP038188.1 | 14564773 | . A G | NM_064540.5                                            |           |            |
| 728 | CP038188.1 | 14566793 | . A G | NM_064540.5                                            |           |            |
| 729 | CP038189.1 | 868851   | . G A | NM_064864.4                                            |           |            |
| 730 | CP038189.1 | 3241442  | . T C | NM_001312987.1,NM_001312988.1,NM_001312989.1,          |           |            |
| 731 |            |          |       | NM_001312990.1, NM_001312991.1,NM_065249.4,NR_132448.1 |           |            |
| 732 | CP038189.1 | 3242621  | . T A | NM_001312987.1,NM_001312988.1,NM_001312989.1,          |           |            |
| 733 |            |          |       | NM_001312990.1, NM_001312991.1,NM_065249.4,NR_132448.1 |           |            |
| 734 | CP038189.1 | 3243526  | . C T | NM_001312987.1,NM_001312988.1,NM_001312989.1,          |           |            |
| 735 |            |          |       | NM_001312990.1, NM_001312991.1,NM_065249.4,NR_132448.1 |           |            |
| 736 | CP038189.1 | 3243758  | . C G | NM_001312987.1,NM_001312988.1,NM_001312989.1,          |           |            |
| 737 |            |          |       | NM_001312990.1, NM_001312991.1,NM_065249.4,NR_132448.1 |           |            |
| 738 | CP038189.1 | 5916103  | . C T | NM_001025978.2,NM_001322590.1,NM_065810.5              |           |            |
| 739 | CP038189.1 | 9451763  | . G T | NM_066632.4                                            |           |            |
| 740 | CP038189.1 | 9511211  | . T C | NM_066641.4                                            |           |            |
| 741 | CP038189.1 | 9511214  | . T G | NM_066641.4                                            |           |            |
| 742 | CP038189.1 | 9511216  | . T C | NM_066641.4                                            |           |            |
| 743 | CP038190.1 | 1858555  | . T C | NM_067741.3                                            |           |            |
| 744 | CP038190.1 | 10369987 | . G T | NM_001268547.1                                         |           |            |
| 745 | CP038190.1 | 10370717 | . A G | NM_001268547.1                                         |           |            |
| 746 | CP038190.1 | 10371317 | . G T | NM_001268547.1                                         |           |            |
| 747 | CP038191.1 | 6587736  | . G A | NM_072284.3                                            |           |            |
| 748 | CP038191.1 | 6587962  | . C T | NM_072284.3                                            |           |            |
| 749 | CP038191.1 | 6588499  | . T C | NM_072284.3                                            |           |            |
| 750 | CP038191.1 | 6588730  | . A G | NM_072284.3                                            |           |            |
| 751 | CP038191.1 | 6589213  | . A T | NM_072284.3                                            |           |            |
| 752 | CP038191.1 | 6589572  | . C T | NM_072284.3                                            |           |            |

753 CP038191.1 6589592 . G T NM\_072284.3  
754 CP038191.1 6590394 . A G NM\_072284.3  
755 CP038191.1 11754638. T A NM\_001313082.1,NM\_073559.5,NR\_132532.1  
756 CP038191.1 11755672. T C NM\_001313082.1,NM\_073559.5,NR\_132532.1  
757 CP038192.1 849854 . T A NM\_001029433.3,NM\_001029434.2,NM\_001313412.1,  
758 NM\_001313413.1, NM\_001313414.1,NM\_001313415.1,NM\_001313416.1,  
759 NM\_001313417.1, NM\_075760.4  
760 CP038192.1 4528158 . G A NM\_076370.3  
761 CP038192.1 4531883 . T G NM\_076370.3  
762 CP038192.1 4532576 . A G NM\_076370.3  
763 CP038192.1 4533748 . G A NM\_076370.3

|     | Contig      | Position | ID    | Reference                                                      | Alternate | Transcript                                                               |
|-----|-------------|----------|-------|----------------------------------------------------------------|-----------|--------------------------------------------------------------------------|
| 764 |             |          |       |                                                                |           | <b>Table S6.</b> <i>C. elegans</i> JU1395 dauer transcript polymorphisms |
| 765 |             |          |       |                                                                |           | Contig Position ID Reference Alternate Transcript                        |
| 766 | tig00000092 | 2423999  | . A G | NM_171785.3,NM_171974.4                                        |           |                                                                          |
| 767 | tig00000120 | 2019762  | . A G | NM_001029191.1                                                 |           |                                                                          |
| 768 | tig00000125 | 502781   | . C T | NM_001028052.2,NM_001028053.2,NM_001307520.1,                  |           |                                                                          |
| 769 |             |          |       | NM_001307521.1,NM_067740.4,NM_067741.3,NM_171279.3,NM_171280.2 |           |                                                                          |
| 770 | tig00000125 | 514996   | . T C | NM_001028052.2,NM_001028053.2,NM_001307520.1,                  |           |                                                                          |
| 771 |             |          |       | NM_001307521.1,NM_067740.4,NM_067741.3,NM_171279.3,NM_171280.2 |           |                                                                          |
| 772 | tig00000258 | 517417   | . C T | NM_001027168.1                                                 |           |                                                                          |
| 773 | tig00000258 | 517598   | . C T | NM_001027168.1                                                 |           |                                                                          |
| 774 | tig00000258 | 517607   | . G A | NM_001027168.1                                                 |           |                                                                          |
| 775 | tig00000258 | 517629   | . T C | NM_001027168.1                                                 |           |                                                                          |
| 776 | tig00000258 | 517630   | . T C | NM_001027168.1                                                 |           |                                                                          |
| 777 | tig00000383 | 222668   | . G C | NM_062254.1                                                    |           |                                                                          |
| 778 | tig00007769 | 2101054  | . G A | NM_064238.3                                                    |           |                                                                          |
| 779 | tig00007769 | 2101075  | . G A | NM_064238.3                                                    |           |                                                                          |
| 780 | tig00007769 | 2101237  | . A G | NM_064238.3                                                    |           |                                                                          |
| 781 | tig00007770 | 471905   | . A G | NM_001026793.1                                                 |           |                                                                          |
| 782 | tig00007770 | 471906   | . C T | NM_001026793.1                                                 |           |                                                                          |
| 783 | tig00007770 | 496385   | . T C | NM_001026792.3                                                 |           |                                                                          |
| 784 | tig00007778 | 854013   | . A G | NM_001029433.3,NM_001029434.2,NM_001313412.1,                  |           |                                                                          |
| 785 |             |          |       | NM_001313413.1,NM_001313414.1,NM_001313415.1,NM_001313416.1,   |           |                                                                          |
| 786 |             |          |       | NM_075760.4                                                    |           |                                                                          |
| 787 | tig00007778 | 855295   | . A T | NM_001029433.3,NM_001029434.2,NM_001313412.1,                  |           |                                                                          |
| 788 |             |          |       | NM_001313413.1,NM_001313414.1,NM_001313415.1,NM_001313416.1,   |           |                                                                          |
| 789 |             |          |       | NM_075760.4                                                    |           |                                                                          |
